# Supplementary material for: The ribosomal P-stalk couples amino acid starvation to GCN2 activation in mammalian cells
Source: eLife journal article supplement (doi:10.7554/elife.50149), 2019-11-21
Supplement: supp [file elife-50149-supp-v1.zip]

A

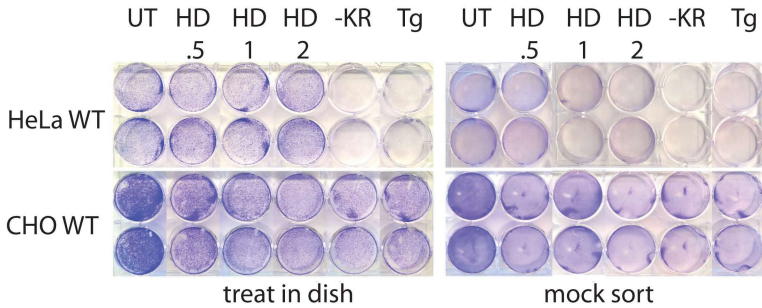

B

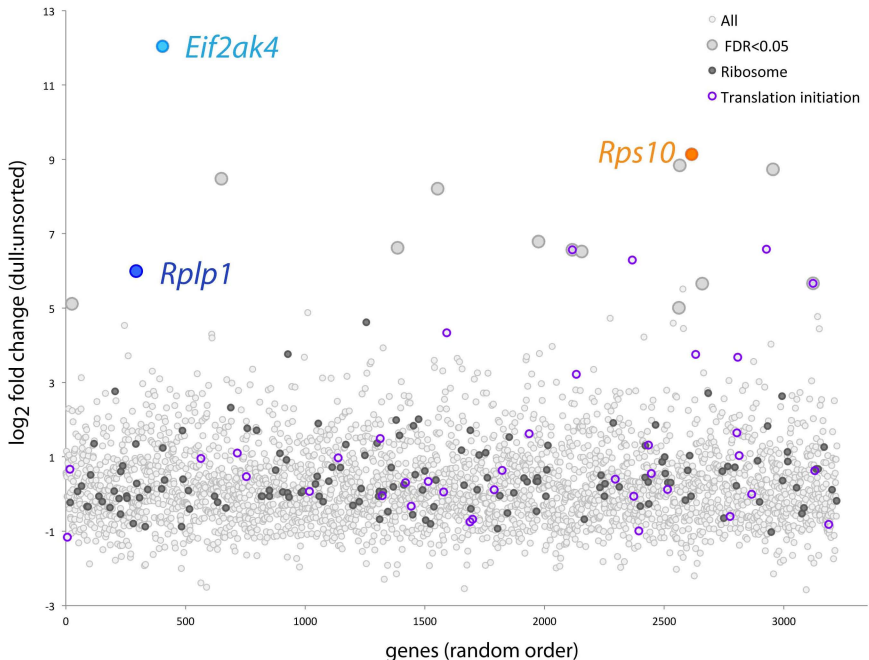

**Figure1 supplement1. Poor clonogenic potential of stressed HeLa compared with CHO cells** **A.** Photograph of crystal violet stained plates of cultured HeLa and CHO cells following exposure to the indicated concentration of histidinol (in mM, for 20 hours), starvation of lysine and arginine (-KR, 20 hours) or treatment with thapsigargin (500 nM, 20 hours). The cells to the left were allowed to recover in the original dish following treatment ("treat in dish"), whereas those to the right were released in PBS 4 mM EDTA, washed in PBS-0.1% BSA, stored on ice for 1 hour in the same buffer and re-plated ("mock sort") to mimic the conditions encountered in a screen with FACS-based enrichment step **B.** Plot of the mean log2 fold change from for each of the 3222 genes in the CHO mini library in selected dull histidinol treated cells compared to histidinol treated un-sorted cells. For 3210 genes n=6 guides/gene, and for 12 genes n=1 to 5 guides/gene. Color-coding of circular symbols indicates genes of the following categories: most (open light grey), false discovery rate (FDR) <0.05 (large, filled light grey), ribosomal (filled dark grey), translation initiation factors (open purple), *elf2ak4* (light blue), *Rps10* (orange), and *Rplp1* (dark blue).
