# Supplementary material for: The ribosomal P-stalk couples amino acid starvation to GCN2 activation in mammalian cells
Source: eLife journal article supplement (doi:10.7554/elife.50149), 2019-11-21
Supplement: supp [file elife-50149-supp-v1.zip]

Archive with 6 entries (6 files):
- elife_poa_e50149_Figure_1_figure_supplement_1.pdf
- elife_poa_e50149_Figure_5_figure_supplement_1.pdf
- elife_poa_e50149_Figure_6_figure_supplement_1.pdf
- elife_poa_e50149_Figure_3_figure_supplement_1.pdf
- elife_poa_e50149_Transparent_Reporting_File.docx
- elife_poa_e50149_Supplementary_file_1.xlsx
