# Supplementary material for: The ribosomal P-stalk couples amino acid starvation to GCN2 activation in mammalian cells
Source: eLife journal article supplement (doi:10.7554/elife.50149), 2019-11-21
Supplement: supp [file elife-50149-supp-v1.zip]

A

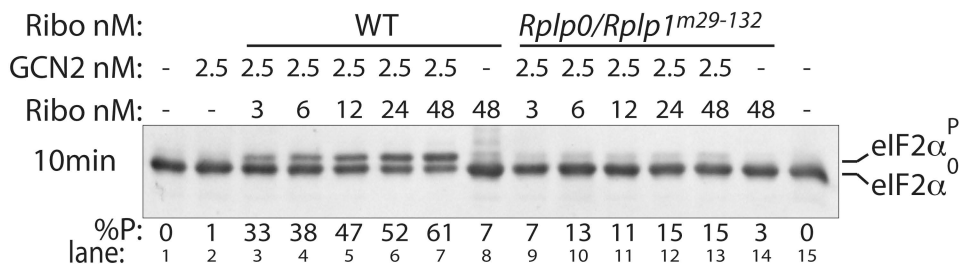

B

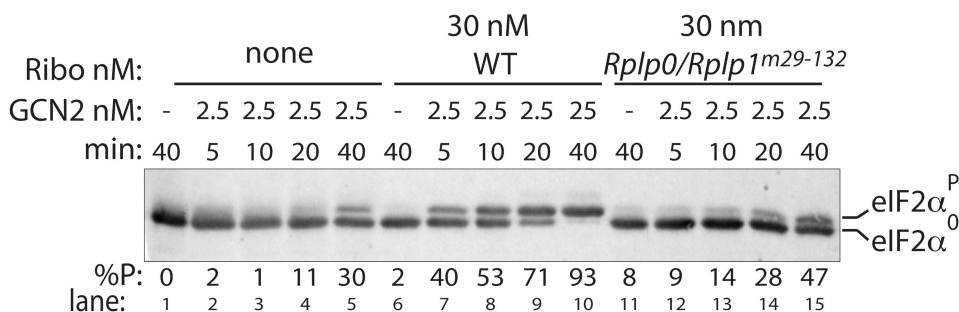

C

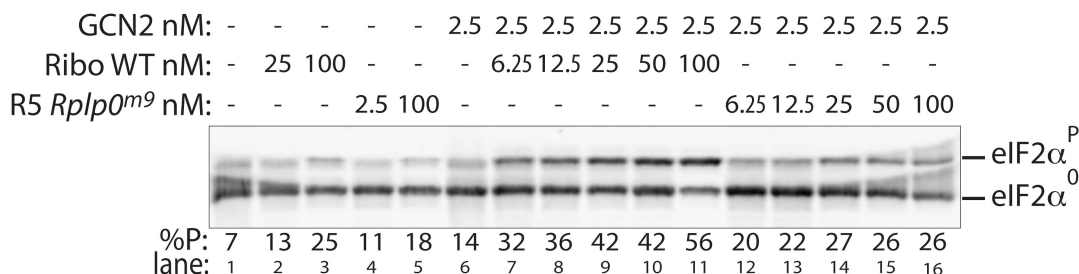

**Figure 5 supplement1 P-stalk lesions (reproducibly) impair ribosome stimulation of eIF2α directed GCN2 kinase activity** **A.** Immunoblot of eIF2α from in vitro phosphorylation reactions resolved by phos-tag SDS-PAGE, as in Figure 5A but utilizing different preparation of wildtype and *Rplp0/Rplp1<sup>m29-132</sup>* compound mutant ribosomes. Reaction time was 10 minutes **B.** Time course, as in figure 5B but utilizing different preparation of wildtype and *Rplp0/Rplp1<sup>m29-132</sup>* compound mutant ribosomes (at 30 nM) or no ribosomes. **C.** As in "A" above but using wildtype or *Rplp0<sup>m9</sup>* mutant ribosomes. (Shown are representative of experiments reproduced at least twice)
