# Supplementary material for: The ribosomal P-stalk couples amino acid starvation to GCN2 activation in mammalian cells
Source: eLife journal article supplement (doi:10.7554/elife.50149), 2019-11-21
Supplement: supp [file elife-50149-supp-v1.zip › elife_poa_e50149_Figure_3_figure_supplement_1.pdf]

A

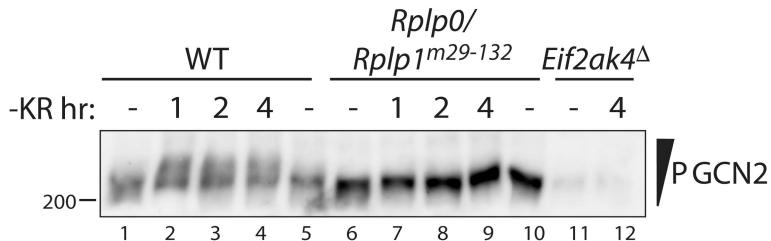

B

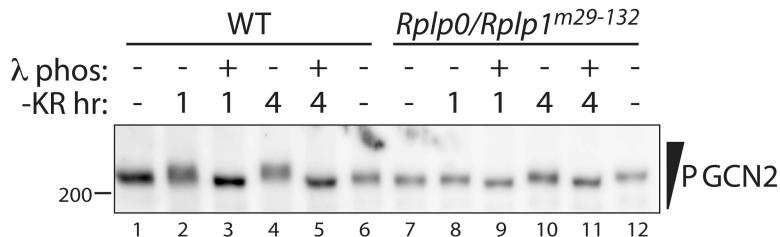

**Figure 3 supplement 1: Impaired translational control, GCN2 activation, and ISR induction in amino acid starved P-stalk mutant cells (reporting on reproducibility of the observations shown in Figure 3)**

A. GCN2 immunoblot of extracts from wildtype (WT), compound P-stalk *Rplp0/Rplp1<sup>m29-132</sup>* double mutant cells, or GCN2-ablated *Eif2ak4<sup>Δ</sup>* mutant cells, untreated or starved of lysine and arginine (-KR) resolved by phos-tag SDS-PAGE. B. As in "A" but following in vitro exposure of the lysate to λ phosphatase (λ phos).
