# Supplementary material for: The ribosomal P-stalk couples amino acid starvation to GCN2 activation in mammalian cells
Source: eLife journal article supplement (doi:10.7554/elife.50149), 2019-11-21
Supplement: supp [file elife-50149-supp-v1.zip › elife_poa_e50149_Figure_6_figure_supplement_1.pdf]

A

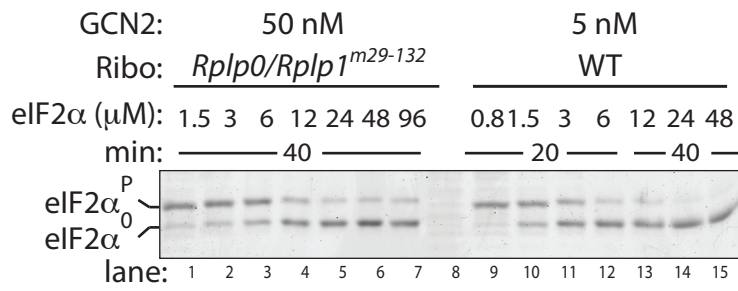

B

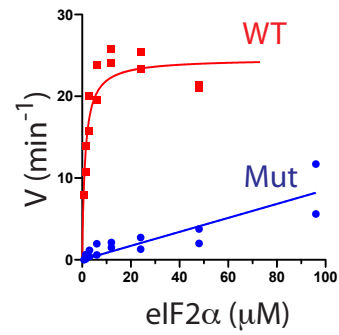

**Figure 6. Supplement 1** A. Immunoblot of eIF2 $\alpha$  from *in vitro* phosphorylation reactions with escalating concentration of eIF2 $\alpha$  and ribosomes from cells of the indicated genotype added at 30 nM. Aliquots of each reaction containing equal amounts of eIF2 $\alpha$  (~120 ng) were applied to the phos-tag gel. (Shown is a representative of experiments reproduced twice). B. Plot of individual values of enzyme velocity (in min<sup>-1</sup>) against substrate concentration (in  $\mu$ M) of the reactions from two experiments (as in "A") and a repeated experiment with Michaelis-Menten curve fit. Reactions with wildtype ribosomes were saturable whereas reactions with mutant ribosomes exhibited no saturation at the highest concentrations of substrate tested. The difference in the absolute values of reaction velocity in comparison with the experiment shown in Figure 6C likely reflects differences in the specific activity of the GCN2 enzyme used
