# Supplementary material for: The ribosomal P-stalk couples amino acid starvation to GCN2 activation in mammalian cells
Source: eLife journal article supplement (doi:10.7554/elife.50149), 2019-11-21
Supplement: supp [file elife-50149-supp-v1.zip › elife_poa_e50149_Supplementary_file_1.xlsx]

## Sheet: Sheet1
Key Resources Table
Reagent type (species) or resource	Designation	Source or reference	Identifiers	Additional information
antibody	anti ATF4 (Rabbit polyclonal)	Harding et al., 2000	CHOP11/ATF4	used at 1/3000
antibody	anti CHOP (Rabbit polyclonal)	Harding et al., 1999	CHOP	used at 1/3000
antibody	anti PDI, (Mouse monoclonal)	Enzo	ADI-SPA-891, RRID AB_10615355	used at 1/1000
antibody	anti HA (Mouse monoclonal)	Roche	11583816001, RRID: AB_514505	used at 1/1000
antibody	anti RPLP0 (uL10) aa 1-200, (Rabbit monoclonal)	Abcam	ab192866, RRID: AB_2814809 (pending)	used at 1/1000
antibody	anti P-protein (Mouse monoclonal)	Vilella et al., 1991	3BH5	gift of Miguel Remacha, Centro de Biologia Molecular Severo Ochoa, Madrid, Spain, used at 1/5
antibody	Anti-pGCN2 T899 (Rabbit monoclonal)	Abcam	ab75836, RRID: AB_1310260	used at 1/1000
antibody	anti mGCN2 (Rabbit polyclonal)	Harding et al., 2000	NY168	used at 1/3000
antibody	anti-KLH-GCN2 890-904 (phospho T899), (Rabbit polyclonal)	Harding et al., 2000	NY6779	used at 1/3000
antibody	anti eIF2α (residues 1–185), (Rabbit polyclonal)	Chen et al., 2015	NY1308	used at 1/3000
antibody	anti rabbit IgG, (Goat polyclonal)	LI-COR	926-32211, RRID: AB_621843	used at 1/2000
antibody	anti mouse IgG, (Goat polyclonal)	LI-COR	926-32210, RRID: AB_621842	used at 1/2000
antibody	anti rabbit IgG, (Goat polyclonal)	Jackson immunoresearch	111-035-144, RRID: AB_2307391	used at 1/2000
Cell line, (Homo sapiens)	HeLa-CHOP::GFP	This paper	Hela_55_CHOP::GFP, mCherry	Hela CHOP::GFP,mCherry (constitutive) reporter line. The parental HELA cell line is from the ATCC.
Cell line, (Homo sapiens)	HeLa-CHOP::GFP-Cas9-Blast	This paper	Hela_55_XCCG_C9-Blast	Hela CHOP::GFP,mCherry (constitutive) with Cas9-blast, Origin of parental line ATCC
Cell line, (Cricetulus griseus)	HeLa-CHOP::GFP Eif2ak4	This paper	Hela 55_GCN2 c23	Hela CHOP::GFP,mCherry line with inactivated Eif2ak4 gene, Origin of parental line ATCC
Cell line, (Cricetulus griseus)	CHO WT CHOP::GFP, XBP1::mCherry	This paper	CHOK1_XCCG_dp19	CHO CHOP::GFP, XBP1::mCherry, delta puro 19,
Cell line, (Cricetulus griseus)	CHO Eif2ak4	This paper	GCN2_5-9	CHO CHOP::GFP, XBP1::mCherry, with mutant Eif2ak4
Cell line, (Cricetulus griseus)	RPLP0m9	This paper	RPLP0_3-9	CHO reporter line with mutant Rplp0 encoding uL10Y231*
Cell line, (Cricetulus griseus)	RPLP0m14	This paper	RPLP0_3-14	CHO reporter line with mutant Rplp0 encoding uL10E217fs*30
Cell line, (Cricetulus griseus)	RPLP0m15	This paper	RPLP0_3-15	CHO reporter line with mutant Rplp0 encoding uL10V248fs*7
Cell line, (Cricetulus griseus)	RPLP0m6	This paper	RPLP0_2-6	CHO reporter line with mutant Rplp0 encoding uL10G196-I206
Cell line, (Cricetulus griseus)	RPLP1m8	This paper	RPLP1_4-8	CHO CHOP::GFP, XBP1::mCherry, with mutant Rplp1
Cell line, (Cricetulus griseus)	RPLP1m9	This paper	RPLP1_4-9	CHO CHOP::GFP, XBP1::mCherry, with mutant Rplp1
Cell line, (Cricetulus griseus)	RPLP0m9-RS7	This paper	RPLP0_3-9_R7-6_x_Tet_BirA	CHO RPLP0m9 rescued with 3xHA tagged Rplp0 knock in allele
Cell line, (Cricetulus griseus)	RPLP0m29-132	This paper	RPLP0_3-9_RPLP1_TF29-132	CHO reporter line with mutations encoding uL10Y231*Rplp1H17-D18
Peptide, recombinant protein	hGCN2	Inglis et al., 2019	hGCN2	StrepII-tagged protein purified from insect Sf9 cells
Peptide, recombinant protein	RNAsin Plus	Promega	N2615
Software, algorithm	MAGECK software	(Li et al., 2014)
Software, algorithm	metascape	(Zhou et al., 2019)
Software, algorithm	Prism	GraphPad
Chemical compound, drug	L-Histidinol dihydrochloride	Sigma Aldrich (MERCK)	1596-64-1
Chemical compound, drug	Blasticidin	Thermo-Fisher	A1113903
Chemical compound, drug	Thapsigargin	MERCK-milipore	586005
Chemical compound, drug	Puromycin	MERCK-milipore	540222
Chemical compound, drug	Protease inhibitors	Sigma Aldrich (MERCK)	S8830
Chemical compound, drug	phos-tag-acrylamide	Apex Biotechnology, Hsinchu City, Taiwan	F4002
Commercial assay or kit	MycoAlert (TM) Mycoplasma Detection Kit	Lonza	LT07-118
Recombinant DNA reagent	Human CRISPR Knockout Pooled Library (GeCKO v2) sgRNA and pLenti-Cas9-Blast (plasmids)	Sanjana et al., 2014	Addgene 1000000049	human CRISPR whole genome library, gift from Feng Zhang)
Recombinant DNA reagent	pRc/RSV (plasmid)	Invitrogen	I1
Recombinant DNA reagent	CHOP::GFP (plasmid)	Novoa et al., 2001	M31
Recombinant DNA reagent	pbabe puro (plasmid)	addgene #1764	UK30
Recombinant DNA reagent	pCAX-F-XBP1∆DBD-mCherry (MP5) (plasmid)	This paper	UK1313
Recombinant DNA reagent	pMD2.G (plasmid)	unpublished, gift from Didier Trono	Addgene plasmid 12259	lentiviral packaging helper, (VSVG)
Recombinant DNA reagent	psPAX2 (plasmid)	unpublished, gift from Didier Trono	Addgene plasmid 12260	next gen lentiviral packaging helper
Recombinant DNA reagent	LentiGuide-puro (plasmid)	Sanjana et al., 2014	Addgene plasmid 52963	gift from Feng Zhang
Recombinant DNA reagent	hsEIF2AK4_guide1_pSpCas9(BB)-2A-Puro (MP1) (plasmid)	This paper	UK1731	sgRNA plasmid for human Eif2ak4 gene
Recombinant DNA reagent	hsEIF2AK4_guide2_pSpCas9(BB)-2A-Puro (MP1) (plasmid)	This paper	UK1732	sgRNA plasmid for human Eif2ak4 gene
Recombinant DNA reagent	pKLV-U6gRNA(BbsI)-PGKpuro2ABFP (plasmid)	Koike-Yusa et al., 2014	Addgene 50946	BFP-2A-Puro tagged gRNAvector, gift from Kosuke Yusa
Recombinant DNA reagent	puro_g1_pSpCas9(BB)-2A-GFP (plasmid)	This paper	UK1901	GFP-tagged sgRNA plasmid targeting puromycin (oligos UK1687 & UK1688)
Recombinant DNA reagent	puro_g2_pSpCas9(BB)-2A-GFP (plasmid)	This paper	UK1902	GFP-tagged sgRNA plasmid targeting puromycin (oligos UK1689 & UK1690)
Recombinant DNA reagent	2189_cgEif2ak4_g6_pKLV-U6gRNA-PGKpuro2ABFP (plasmid)	This paper	UK2189	sgRNA plasmid for chinese hamster (CHO) Eif2ak4 gene
Recombinant DNA reagent	2197_cgRplp0_g2_pKLV-U6gRNA-PGKpuro2ABFP (plasmid)	This paper	UK2197	sgRNA plasmid for chinese hamster (CHO) RPLP0 gene (oligos UK2061, UK2062)
Recombinant DNA reagent	2198_cgRplp0_g6_pKLV-U6gRNA-PGKpuro2ABFP (plasmid)	This paper	UK2198	sgRNA plasmid for chinese hamster (CHO) RPLP0 gene (oligos UK2063, UK2064)
Recombinant DNA reagent	2199_cgRplp1_g3_pKLV-U6gRNA-PGKpuro2ABFP (plasmid)	This paper	UK2199	sgRNA plasmid for chinese hamster (CHO) RPLP1 gene (oligos UK2065, UK2066)
Recombinant DNA reagent	2310_RPLP0_5HA_g3_pKLV-U6gRNA-PGKpuro2ABFP (plasmid)	This paper	UK2310	RPLP0_5HA_g3 guide vector (oligos UK2215, UK2216)
Recombinant DNA reagent	2311_RPLP0_5HA_g1_pKLV-U6gRNA-PGKpuro2ABFP (plasmid)	This paper	UK2311	RPLP0_5HA_g1 guide vector (oligos UK2217, UK2218)
Recombinant DNA reagent	2312_RPLP0_3HA_g14_pKLV-U6gRNA-PGKpuro2ABFP (plasmid)	This paper	UK2312	RPLP0_3HA_g14 guide vector (oligos UK2219, UK2220)
Recombinant DNA reagent	2313_RPLP0_3HA_g9_pKLV-U6gRNA-PGKpuro2ABFP (plasmid)	This paper	UK2313	RPLP0_3HA_g9 guide vector (oligos UK2221, UK2222)
Recombinant DNA reagent	RPLP0_repair_V3_pUC57 (plasmid)	This paper	UK2324	synthetic repar template for knocking in 3xHA-tev_AviTag into ceRPLP0
Recombinant DNA reagent	pKLV-CHO_libB-PGKpuro2ABFP (plasmid)	This paper	UK2560	CHO CRISPR KO library of 19305 selected guides for GCN screening
Sequence-based reagent	NEBNXT01_CRISPR_1418	This paper	1418	CAAGCAGAAGACGGCATACGAGATCGTGATGTGACTGGAGTTCAGACGTGTGCTCTTCCGATCTTCTACTATTCTTTCCCCTGCACTGT
Sequence-based reagent	NEBNXT02_CRISPR_1419	This paper	1419	CAAGCAGAAGACGGCATACGAGATACATCGGTGACTGGAGTTCAGACGTGTGCTCTTCCGATCTTCTACTATTCTTTCCCCTGCACTGT
Sequence-based reagent	NEBNXT03_CRISPR_1420	This paper	1420	CAAGCAGAAGACGGCATACGAGATTGCCTAAGTGACTGGAGTTCAGACGTGTGCTCTTCCGATCTTCTACTATTCTTTCCCCTGCACTGT
Sequence-based reagent	NEBNXT04_CRISPR_1421	This paper	1421	CAAGCAGAAGACGGCATACGAGATTGGTCAGTGACTGGAGTTCAGACGTGTGCTCTTCCGATCTTCTACTATTCTTTCCCCTGCACTGT
Sequence-based reagent	NEBNXT05_CRISPR_1422	This paper	1422	CAAGCAGAAGACGGCATACGAGATCACTGTGTGACTGGAGTTCAGACGTGTGCTCTTCCGATCTTCTACTATTCTTTCCCCTGCACTGT
Sequence-based reagent	NEBNXT06_CRISPR_1423	This paper	1423	CAAGCAGAAGACGGCATACGAGATTATTGGCGTGACTGGAGTTCAGACGTGTGCTCTTCCGATCTTCTACTATTCTTTCCCCTGCACTGT
Sequence-based reagent	NEBNXT07_CRISPR_1424	This paper	1424	CAAGCAGAAGACGGCATACGAGATTGATCTGGTGACTGGAGTTCAGACGTGTGCTCTTCCGATCTTCTACTATTCTTTCCCCTGCACTGT
Sequence-based reagent	NEBNXT08_CRISPR_1425	This paper	1425	CAAGCAGAAGACGGCATACGAGATTTCAAGTGTGACTGGAGTTCAGACGTGTGCTCTTCCGATCTTCTACTATTCTTTCCCCTGCACTGT
Sequence-based reagent	NEBNXT09_CRISPR_1426	This paper	1426	CAAGCAGAAGACGGCATACGAGATTCTGATCGTGACTGGAGTTCAGACGTGTGCTCTTCCGATCTTCTACTATTCTTTCCCCTGCACTGT
Sequence-based reagent	NEBNXT10_CRISPR_1427	This paper	1427	CAAGCAGAAGACGGCATACGAGATAAGCTAGTGACTGGAGTTCAGACGTGTGCTCTTCCGATCTTCTACTATTCTTTCCCCTGCACTGT
Sequence-based reagent	NEBNXT11_CRISPR_1428	This paper	1428	CAAGCAGAAGACGGCATACGAGATTGTAGCCGTGACTGGAGTTCAGACGTGTGCTCTTCCGATCTTCTACTATTCTTTCCCCTGCACTGT
Sequence-based reagent	NEBNXT12_CRISPR_1429	This paper	1429	CAAGCAGAAGACGGCATACGAGATTACAAGGTGACTGGAGTTCAGACGTGTGCTCTTCCGATCTTCTACTATTCTTTCCCCTGCACTGT
Sequence-based reagent	NEBNXT13_CRISPR_1430	This paper	1430	CAAGCAGAAGACGGCATACGAGATTGTTGACTGTGACTGGAGTTCAGACGTGTGCTCTTCCGATCTTCTACTATTCTTTCCCCTGCACTGT
Sequence-based reagent	NEBNXT14_CRISPR_1431	This paper	1431	CAAGCAGAAGACGGCATACGAGATACGGAACTGTGACTGGAGTTCAGACGTGTGCTCTTCCGATCTTCTACTATTCTTTCCCCTGCACTGT
Sequence-based reagent	P5-sgRNA_inner_F_1432	This paper	1432	AATGATACGGCGACCACCGAGATCTACACTCTCTTGTGGAAAGGACGAAACACCG
Sequence-based reagent	sgRNA_outer_short_R_1433	This paper	1433	GTCTGTTGCTATTATGTCTACTATTCTTTCC
Sequence-based reagent	sgRNA_outer_short_F_1434	This paper	1434	GCTTACCGTAACTTGAAAGTATTTCG
Sequence-based reagent	Illumina-sgRNA_seq_1435	This paper	1435	ACACTCTCTTGTGGAAAGGACGAAACACCG
Sequence-based reagent	Illumina_P5_1436	This paper	1436	AATGATACGGCGACCACCGA
Sequence-based reagent	Illumina_P7_1437	This paper	1437	CAAGCAGAAGACGGCATACGAGAT
Sequence-based reagent	Ilumina_Adaptor_R2_1446	This paper	1446	CAAGCAGAAGACGGCATACGAGATGTGACTGGAGTTCAGACGTGTGCTCTTCCGATCTTCTACTATTCTTTCCCCTGCACTGT
Sequence-based reagent	1855_pKLV_INSRT_V2_F	This paper	1855	GCTACTCGACGGGAGAAG
Sequence-based reagent	1856_pKLV_INSRT_V2_R	This paper	1856	CTAGAGCGCTATCACTATGCAG
Sequence-based reagent	hsEIF2AK4_guide1_637_1S	This paper	1464	CACCGCGCTGAGAAATGACTGCACG
Sequence-based reagent	hsEIF2AK4_guide1_637_2AS	This paper	1465	AAACCGTGCAGTCATTTCTCAGCGC
Sequence-based reagent	hsEIF2AK4_guide2_360_1S	This paper	1466	CACCGCAAGGTAGCGTACTACATT
Sequence-based reagent	hsEIF2AK4_guide2_360_2AS	This paper	1467	AAACAATGTAGTACGCTACCTTGC
Sequence-based reagent	hsEIF2AK4_guide3_428_1S	This paper	1468	CACCGAGCCGTGACCATGGGGTGAT
Sequence-based reagent	hsEIF2AK4_guide3_428_2AS	This paper	1469	AAACATCACCCCATGGTCACGGCTC
Sequence-based reagent	puro_G1s_1687	This paper	1687	CACCGGAACTCTTCCTCACGCGCGT
Sequence-based reagent	puro_g1as_1688	This paper	1688	AAACACGCGCGTGAGGAAGAGTTCC
Sequence-based reagent	puro_g2s_1689	This paper	1689	CACCGGTCGGGCGAGACGCCGACGG
Sequence-based reagent	puro_G2as_1690	This paper	1690	AAACCCGTCGGCGTCTCGCCCGACC
Sequence-based reagent	sgRNA_outer_short_R2_1758	This paper	1758	GAATGTGTGCGAGGCCAGAG
Sequence-based reagent	pKLV_NEBNXT01_1759	This paper	1759	CAAGCAGAAGACGGCATACGAGATCGTGATGTGACTGGAGTTCAGACGTGTGCTCTTCCGATCTGAGGCCACTTGTGTAGCGCCAAG
Sequence-based reagent	pKLV_NEBNXT02_1760	This paper	1760	CAAGCAGAAGACGGCATACGAGATACATCGGTGACTGGAGTTCAGACGTGTGCTCTTCCGATCTGAGGCCACTTGTGTAGCGCCAAG
Sequence-based reagent	pKLV_NEBNXT03_1761	This paper	1761	CAAGCAGAAGACGGCATACGAGATTGCCTAAGTGACTGGAGTTCAGACGTGTGCTCTTCCGATCTGAGGCCACTTGTGTAGCGCCAAG
Sequence-based reagent	pKLV_NEBNXT04_1762	This paper	1762	CAAGCAGAAGACGGCATACGAGATTGGTCAGTGACTGGAGTTCAGACGTGTGCTCTTCCGATCTGAGGCCACTTGTGTAGCGCCAAG
Sequence-based reagent	pKLV_NEBNXT05_1763	This paper	1763	CAAGCAGAAGACGGCATACGAGATCACTGTGTGACTGGAGTTCAGACGTGTGCTCTTCCGATCTGAGGCCACTTGTGTAGCGCCAAG
Sequence-based reagent	pKLV_NEBNXT06_1764	This paper	1764	CAAGCAGAAGACGGCATACGAGATTATTGGCGTGACTGGAGTTCAGACGTGTGCTCTTCCGATCTGAGGCCACTTGTGTAGCGCCAAG
Sequence-based reagent	pKLV_NEBNXT07_1765	This paper	1765	CAAGCAGAAGACGGCATACGAGATTGATCTGGTGACTGGAGTTCAGACGTGTGCTCTTCCGATCTGAGGCCACTTGTGTAGCGCCAAG
Sequence-based reagent	pKLV_NEBNXT08_1766	This paper	1766	CAAGCAGAAGACGGCATACGAGATTTCAAGTGTGACTGGAGTTCAGACGTGTGCTCTTCCGATCTGAGGCCACTTGTGTAGCGCCAAG
Sequence-based reagent	pKLV_NEBNXT09_1767	This paper	1767	CAAGCAGAAGACGGCATACGAGATTCTGATCGTGACTGGAGTTCAGACGTGTGCTCTTCCGATCTGAGGCCACTTGTGTAGCGCCAAG
Sequence-based reagent	pKLV_NEBNXT10_1768	This paper	1768	CAAGCAGAAGACGGCATACGAGATAAGCTAGTGACTGGAGTTCAGACGTGTGCTCTTCCGATCTGAGGCCACTTGTGTAGCGCCAAG
Sequence-based reagent	pKLV_NEBNXT11_1769	This paper	1769	CAAGCAGAAGACGGCATACGAGATTGTAGCCGTGACTGGAGTTCAGACGTGTGCTCTTCCGATCTGAGGCCACTTGTGTAGCGCCAAG
Sequence-based reagent	pKLV_NEBNXT12_1770	This paper	1770	CAAGCAGAAGACGGCATACGAGATTACAAGGTGACTGGAGTTCAGACGTGTGCTCTTCCGATCTGAGGCCACTTGTGTAGCGCCAAG
Sequence-based reagent	pKLV_NEBNXT13_1771	This paper	1771	CAAGCAGAAGACGGCATACGAGATTGTTGACTGTGACTGGAGTTCAGACGTGTGCTCTTCCGATCTGAGGCCACTTGTGTAGCGCCAAG
Sequence-based reagent	pKLV_NEBNXT14_1772	This paper	1772	CAAGCAGAAGACGGCATACGAGATACGGAACTGTGACTGGAGTTCAGACGTGTGCTCTTCCGATCTGAGGCCACTTGTGTAGCGCCAAG
Sequence-based reagent	pKLV_NEBNXT15_1773	This paper	1773	CAAGCAGAAGACGGCATACGAGATTCTGACATGTGACTGGAGTTCAGACGTGTGCTCTTCCGATCTGAGGCCACTTGTGTAGCGCCAAG
Sequence-based reagent	pKLV_NEBNXT16_1774	This paper	1774	CAAGCAGAAGACGGCATACGAGATCGGGACGGGTGACTGGAGTTCAGACGTGTGCTCTTCCGATCTGAGGCCACTTGTGTAGCGCCAAG
Sequence-based reagent	pKLV_NEBNXT18_1775	This paper	1775	CAAGCAGAAGACGGCATACGAGATGTGCGGACGTGACTGGAGTTCAGACGTGTGCTCTTCCGATCTGAGGCCACTTGTGTAGCGCCAAG
Sequence-based reagent	pKLV_NEBNXT19_1776	This paper	1776	CAAGCAGAAGACGGCATACGAGATCGTTTCACGTGACTGGAGTTCAGACGTGTGCTCTTCCGATCTGAGGCCACTTGTGTAGCGCCAAG
Sequence-based reagent	1855_pKLV_INSRT_V2_F	This paper	1855	GCTACTCGACGGGAGAAG
Sequence-based reagent	1856_pKLV_INSRT_V2_R	This paper	1856	CTAGAGCGCTATCACTATGCAG
Sequence-based reagent	cgEif2ak4_g6_1S_2045	This paper	2045	CACCGGGAAAGCTATTCGCAGCGACGT
Sequence-based reagent	cgEif2ak4_g6_2AS_2046	This paper	2046	TAAAACGTCGCTGCGAATAGCTTTCCC
Sequence-based reagent	cgRplp0_g2_1S_2061	This paper	2061	CACCGCTGTGATGTCAAGCACTTCTGT
Sequence-based reagent	cgRplp0_g2_2AS_2062	This paper	2062	TAAAACAGAAGTGCTTGACATCACAGC
Sequence-based reagent	cgRplp0_g6_1S_2063	This paper	2063	CACCGCAATGGTTACAAGCGGGTCCGT
Sequence-based reagent	cgRplp0_g6_2AS_2064	This paper	2064	TAAAACGGACCCGCTTGTAACCATTGC
Sequence-based reagent	cgRplp1_g3_1S_2065	This paper	2065	CACCGCTGTCACCTCGTCGTCGTGGGT
Sequence-based reagent	cgRplp1_g3_2AS_2066	This paper	2066	TAAAACCCACGACGACGAGGTGACAGC
Sequence-based reagent	cgRplp1_g6_1S_2067	This paper	2067	CACCGCCTCATCCTCCACGACGACGGT
Sequence-based reagent	cgRplp1_g6_2AS_2068	This paper	2068	TAAAACCGTCGTCGTGGAGGATGAGGC
Sequence-based reagent	RPLP1_FA_1S_2171	This paper	2171	TGTGTGACCCTTTCCTCAGCTG
Sequence-based reagent	RPLP1_FA_2AS_2172	This paper	2172	TTCACGGCTGTTGAATCGCG
Sequence-based reagent	RPLP0_FA_1S_2173	This paper	2173	AGTAGGAGCCAGTGAAGCCACA
Sequence-based reagent	RPLP0_FA_2AS_2174	This paper	2174	AGGCTGAAGACGGTTGGCAT
Sequence-based reagent	RPLP0_FA_3S_2175	This paper	2175	TGCAGGGTGTCCGAAATGTTGC
Sequence-based reagent	RPLP0_FA_4AS_2176	This paper	2176	GCAGCCTGCTGTTTGTTACCCT
Sequence-based reagent	2215_RPLP0_5R_g3_S	This paper	2215	CACCGGGAGCTGGTAGCATACCTCTGT
Sequence-based reagent	2216_RPLP0_5R_g3_AS	This paper	2216	TAAAACAGAGGTATGCTACCAGCTCCC
Sequence-based reagent	2217_RPLP0_5R_g1_S	This paper	2217	CACCGATGAACAGGCTGAAGACGGTGT
Sequence-based reagent	2218_RPLP0_5R_g1_AS	This paper	2218	TAAAACACCGTCTTCAGCCTGTTCATC
Sequence-based reagent	2219_RPLP0_3R_g14_S	This paper	2219	CACCGTCAGATGAGGATATGGGATTGT
Sequence-based reagent	2220_RPLP0_3R_g14_AS	This paper	2220	TAAAACAATCCCATATCCTCATCTGAC
Sequence-based reagent	2221_RPLP0_3R_g9_S	This paper	2221	CACCGTGAAGCCAAGGAAGAGTCGGGT
Sequence-based reagent	2222_RPLP0_3R_g9_AS	This paper	2222	TAAAACCCGACTCTTCCTTGGCTTCAC
Sequence-based reagent	cgEIF2AK3_g6_Seq_1S_2373	This paper	2373	TTAGATCCGTAGCCCTCCATAGCC
Sequence-based reagent	cgEIF2AK3_g6_Seq_2AS_2374	This paper	2374	AGGATCTAAGTGGTCGCTCCGA
Sequence-based reagent	CHO_Lib_B	This paper	2580	GCTACTCGACGGGAGAAGACAACACCGN20GTTTTACAGTCTTCCCTGCATAGTGATAGCGCTCTAG
